# Supplementary material for: Coinfection of Porcine Circovirus 2 and Pseudorabies Virus Enhances Immunosuppression and Inflammation through NF-κB, JAK/STAT, MAPK, and NLRP3 Pathways
Source: MDPI journal article supplement (doi:10.3390/ijms23084469), 2022-04-18
Supplement: s1 [file s1]

## **Supplementary Information for**

Coinfection of porcine circovirus 2 and pseudorabies virus enhances immunosuppression and inflammation through NF- $\kappa$ B, JAK/STAT, MAPK, and NLRP3 pathways

Xue Li<sup>#</sup>, Si Chen<sup>#</sup>, Liying Zhang<sup>#</sup>, Guyu Niu, Xinwei Zhang, Lin Yang, Weilong Ji, Linzhu Ren<sup>\*</sup>

**\* Correspondence:** Linzhu Ren

**Email:** [renlz@jlu.edu.cn](mailto:renlz@jlu.edu.cn)

**This PDF file includes:**

Figures S1 to S7

Tables S1

SI References

Supplemental figures

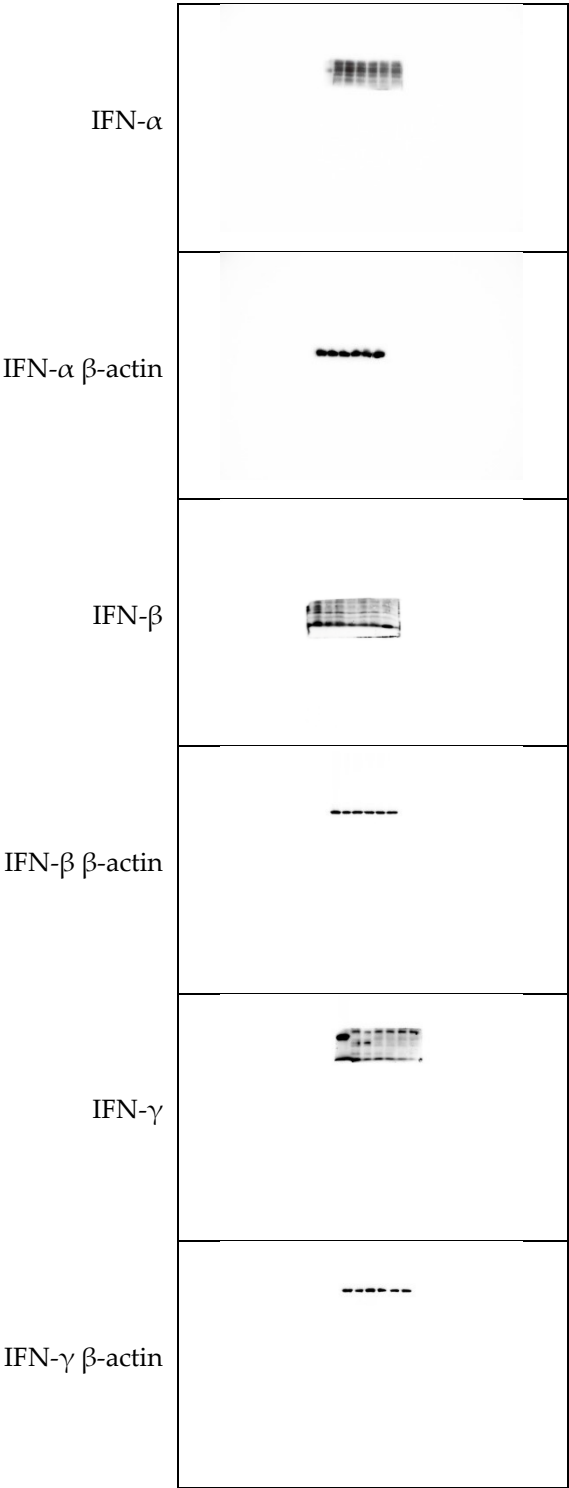

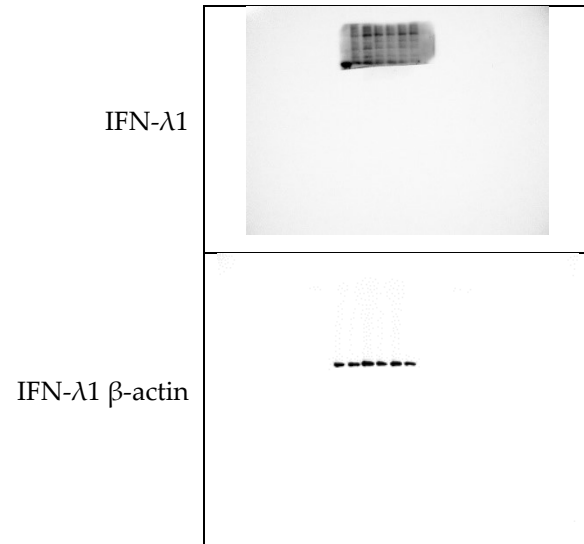

**Figure S1: Original Western images used for preparing Figure 2.**

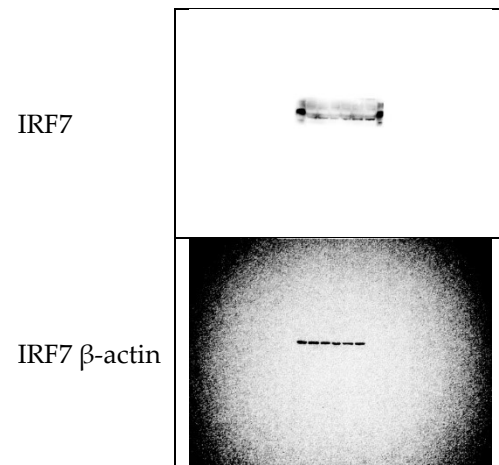

**Figure S2: Original Western images used for preparing Figure 3C.**

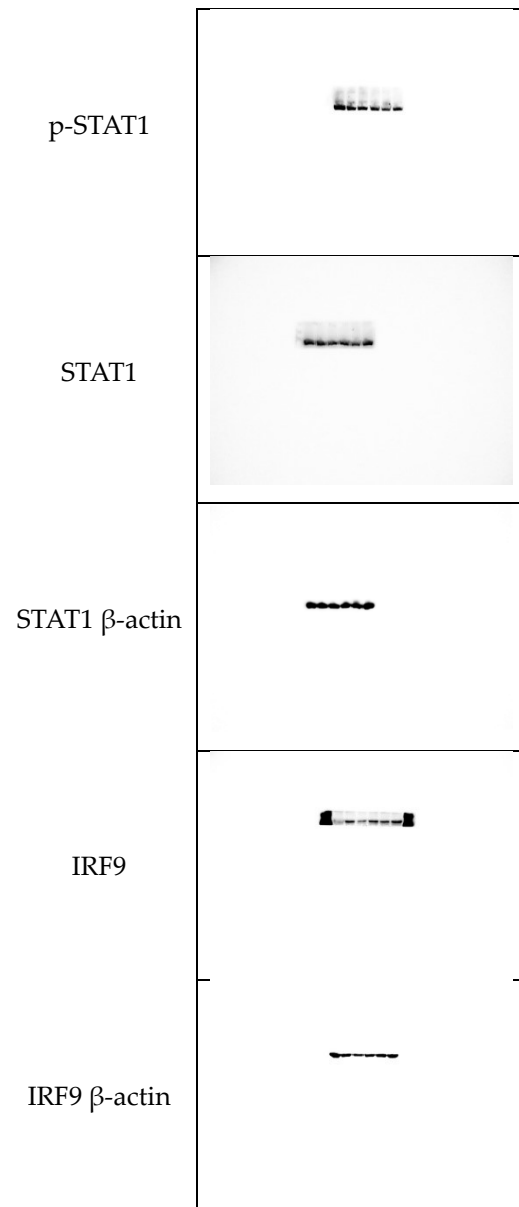

**Figure S3 Original Western images used for preparing Figure 4E.**

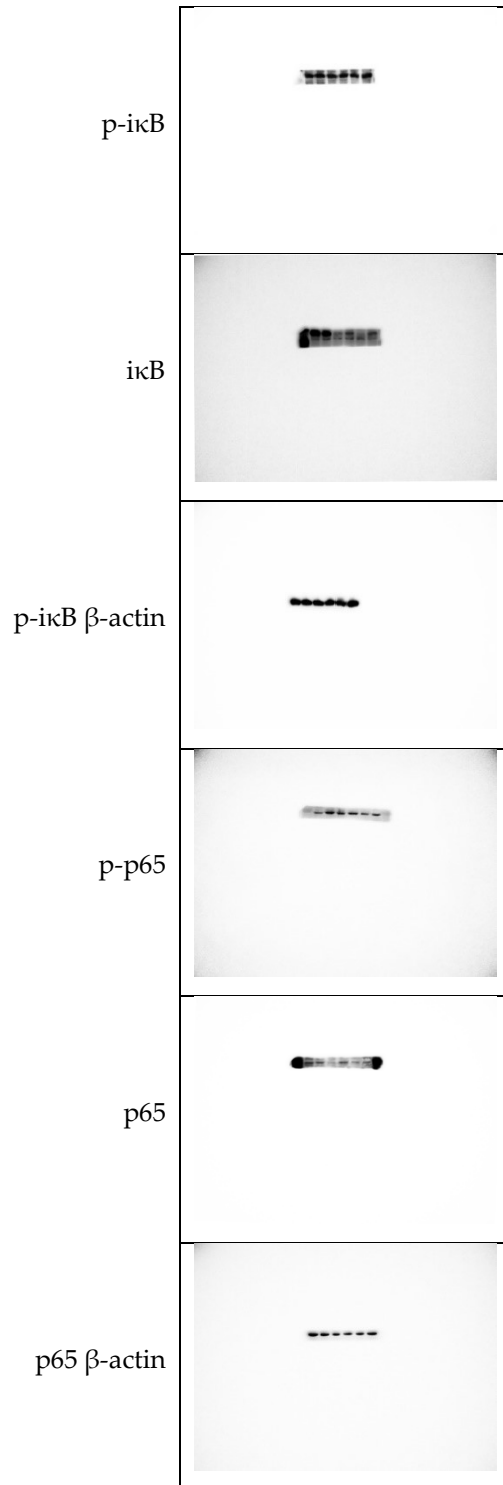

Figure S4 Original Western images used for preparing Figure 5C.

IL1 $\alpha$

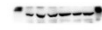

IL1 $\alpha$   $\beta$ -actin

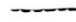

TNF $\alpha$

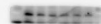

TNF $\alpha$   $\beta$ -actin

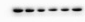

IL6

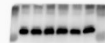

IL6  $\beta$ -actin

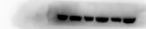

pro-IL1 $\beta$   
and IL1 $\beta$ -cleaved

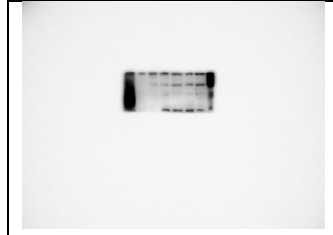

IL1 $\beta$  actin

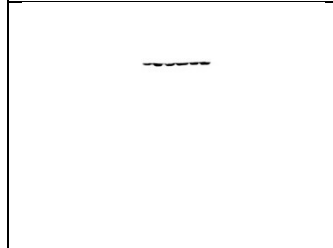

**Figure S5 Original Western images used for preparing Figure 6E.**



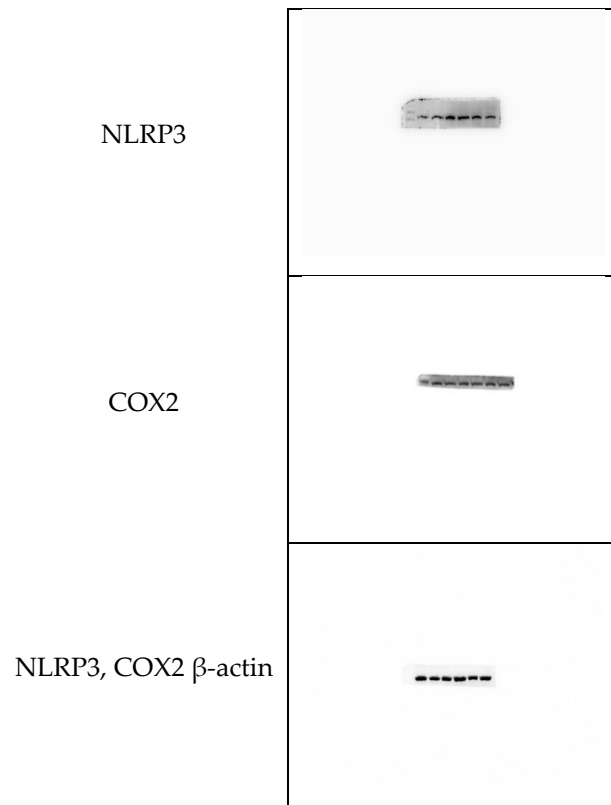

**Figure S6 Original Western images used for preparing Figure 7C.**

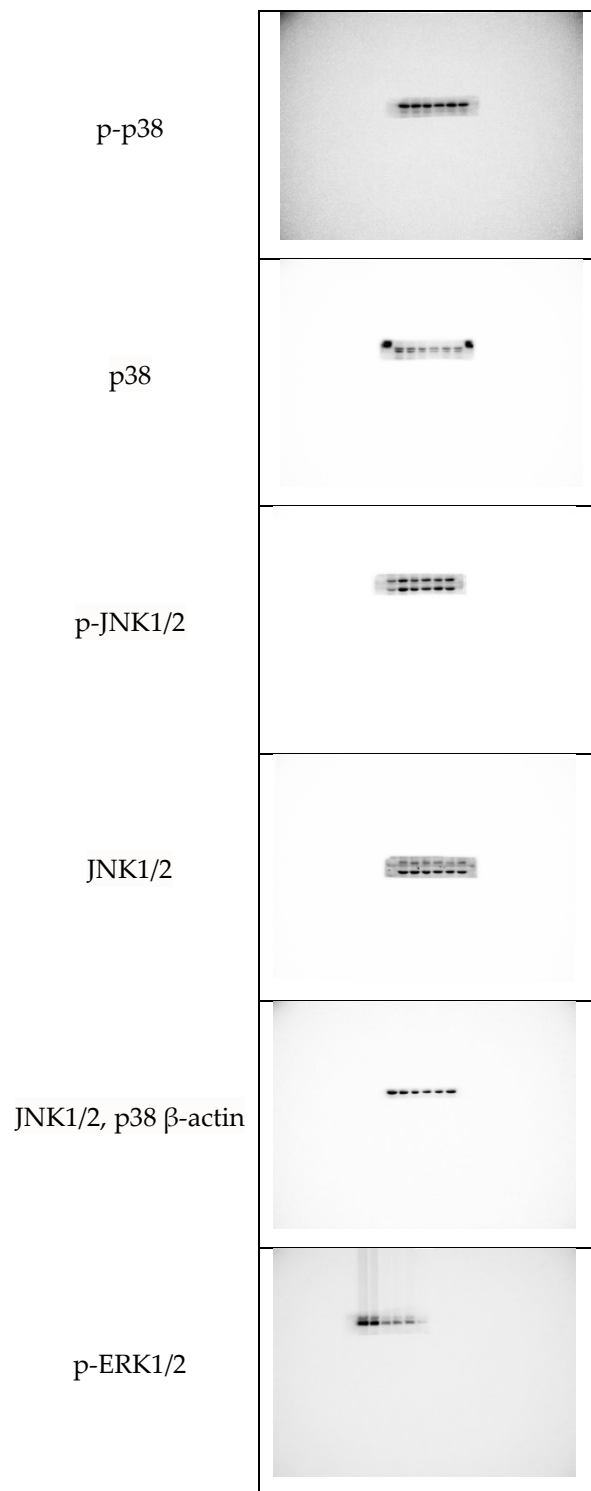

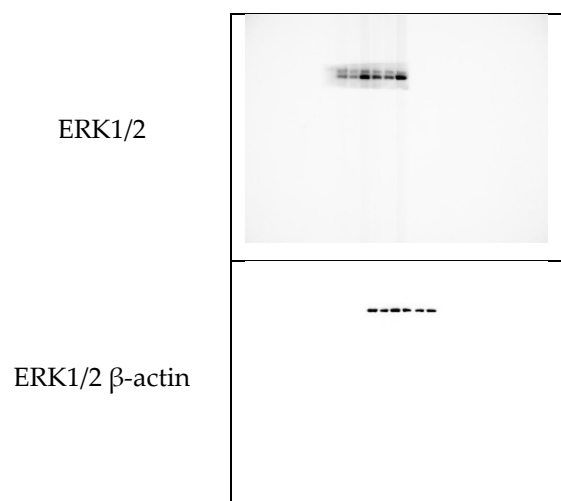

**Figure S7 Original Western images used for preparing Figure 8D.**

## Supplemental Tables

**Table S1 Sequence of primers**

| Primer                       | Sequence (5'-3')         | GenBank No.                  | Reference  |
|------------------------------|--------------------------|------------------------------|------------|
| PCV2 Cap-Q-F                 | TGTAGTATTCAAAGGGCACAGAGC | NC_005148 (1,034..1,735)     | (1)        |
| PCV2 Cap-Q-R                 | CGGATATACTATCAAGAAAACCAC |                              |            |
| PRV gD-Q-F                   | GGTTCAACGAGGGCCAGTACCG   | NC_006151 (121,075..122,277) | (2)        |
| PRV gD-Q-R                   | GCGTCAGGAATCGCATCACGT    |                              |            |
| GAPDH-F                      | GCCATCACCATCTTCCAGG      | NM_001206359                 | (1)        |
| GAPDH-R                      | TCACGCCCATCACAACAT       |                              |            |
| Pig ISG15-F                  | GGCAATGTGCTTCAGGATGG     | NM_001128469                 | This study |
| Pig ISG15-R                  | CAGACCTCATAGGCGTTGCT     | NM_001244363                 | This study |
| Pig ISG56-F                  | GCCTCTCCTTTTAGCCACAGA    |                              |            |
| Pig ISG56-R                  | GCCCATGTTGCTGTTATGTCC    | NM_214029                    | This study |
| Pig IL-1A-F                  | TGGGAGGACCAGGGTACTG      |                              |            |
| Pig IL-1A-R                  | GGTCCATCAGCAACTTAAAGGCA  | NM_214022                    | This study |
| Pig TNF $\alpha$ -F          | AACCTCAGATAAGCCCCGTCG    |                              |            |
| Pig TNF $\alpha$ -R          | GGCATACCCACTCTGCCATT     | NM_214399                    | This study |
| Pig IL-6-F                   | ATCCAGACCCTGAGGCAAAA     |                              |            |
| Pig IL-6-R                   | AGGTGCCCCAGCTACATTAT     | NM_214055                    | This study |
| Pig IL1 $\beta$ -F           | ACCCTCTCCAGCCAGTCTTCATT  |                              |            |
| Pig IL1 $\beta$ -R           | TTGCAGCTGGATGCTCCCAT     | NM_213770                    | This study |
| Pig IRF3-F                   | CCCACCTGGAAGAGGAATTT     |                              |            |
| Pig IRF3-R                   | CTCCTGAGGTCACAAACTATTAG  | NM_001097428                 | This study |
| Pig IRF7-F                   | AGCCCTCTACCCCATCTGT      |                              |            |
| Pig IRF7-R                   | AGCCAGTCTCCGAAGAGCAC     | NM_001078670                 | This study |
| Pig IRF9-F                   | GGAAGTGGGTGGTGGAGCAA     |                              |            |
| Pig IRF9-R                   | CTCTTGTGAGGGCACAGCG      | NM_001114281                 | This study |
| Pig RELA/p65-F               | TGGTGGGAAAACACGGAGAG     |                              |            |
| Pig RELA/p65-R               | ATGCCTCTGTCTTCGTGCT      | NM_001005150                 | This study |
| Pig I $\kappa$ B $\alpha$ -F | CCTGGTGTCTCTCTGTGTA      |                              |            |
| Pig I $\kappa$ B $\alpha$ -R | GCTGCTGTATCCGAGTGCTT     | NM_214114                    | This study |
| Pig Jak1-F                   | CCAGGCAAGAGTGCATAGAA     |                              |            |
| Pig Jak1-R                   | GTGGTTCCAAAGCTCCATTTG    | NM_001204768                 | This study |
| Pig SOCS1-F                  | TCAGTGTGAAGATGGCTTCGG    |                              |            |
| Pig SOCS1-R                  | AGCTCGAAGAGGCAGTCGAA     | NM_001123196                 | This study |
| Pig SOCS3-F                  | ATCCCTCTGGTGTGAGCCG      |                              |            |
| Pig SOCS3-R                  | AGTGGGGCATCGTACTGGTC     | NM_213769                    | This study |
| Pig STAT1-F                  | CCCTGACGGTCTTATTC        |                              |            |
| Pig STAT1-R                  | ATAGTCGTTCCCTCGCTCT      | NM_001044580                 | This study |
| Pig STAT3-F                  | TTCAAACACCTGACCCCTG      |                              |            |
| Pig STAT3-R                  | TCAGCACCAGTAGAGGTTG      | XM_003356615                 | This study |
| Pig p38/MAPK14-F             | GAAAGCAGGGACCTCCTTATAG   |                              |            |
| Pig p38/MAPK14-R             | CGGATTCTCAAGACTCCATCTC   | NM_001198922                 | This study |
| Pig ERK2-F                   | ACCTCAGCAACGACCATA       |                              |            |
| Pig ERK2-R                   | AGACACTGAAACCCAACC       | XM_021073087                 | This study |
| Pig JNK1-F                   | AGTTGGATGAAAGGGAACACACA  |                              |            |
| Pig JNK1-R                   | ACTGCTGCACCTGTGCTAAA     | NM_001256770                 | This study |
| Pig NLRP3-F                  | ACCTGCAAAAACCTGGGGTTGG   |                              |            |
| Pig NLRP3-R                  | TCACCCAGGTCATTGTTGCCT    | NM_214321                    | This study |
| Pig COX2/PTGS2-F             | GAGGTCTTTGGTCTGGTGCCT    |                              |            |
| Pig COX2/PTGS2-R             | CAGCCGTTTCATCGTCCCATTC   |                              |            |

## Reference

1. H. G. Shen *et al.*, Protective immunity against porcine circovirus 2 by vaccination with ORF2-based DNA and subunit vaccines in mice. *J Gen Virol* **89**, 1857-1865 (2008).
2. Z. Peng *et al.*, Pseudorabies virus can escape from CRISPR-Cas9-mediated inhibition. *Virus Res* **223**, 197-205 (2016).
